# Supplementary material
Source: publisher figshare collection journal article supplement (https://frontiersin.figshare.com/ndownloader/files/25007819)
Supplement: Supplementary file 1 [file 25007819]

## Supplementary Figures

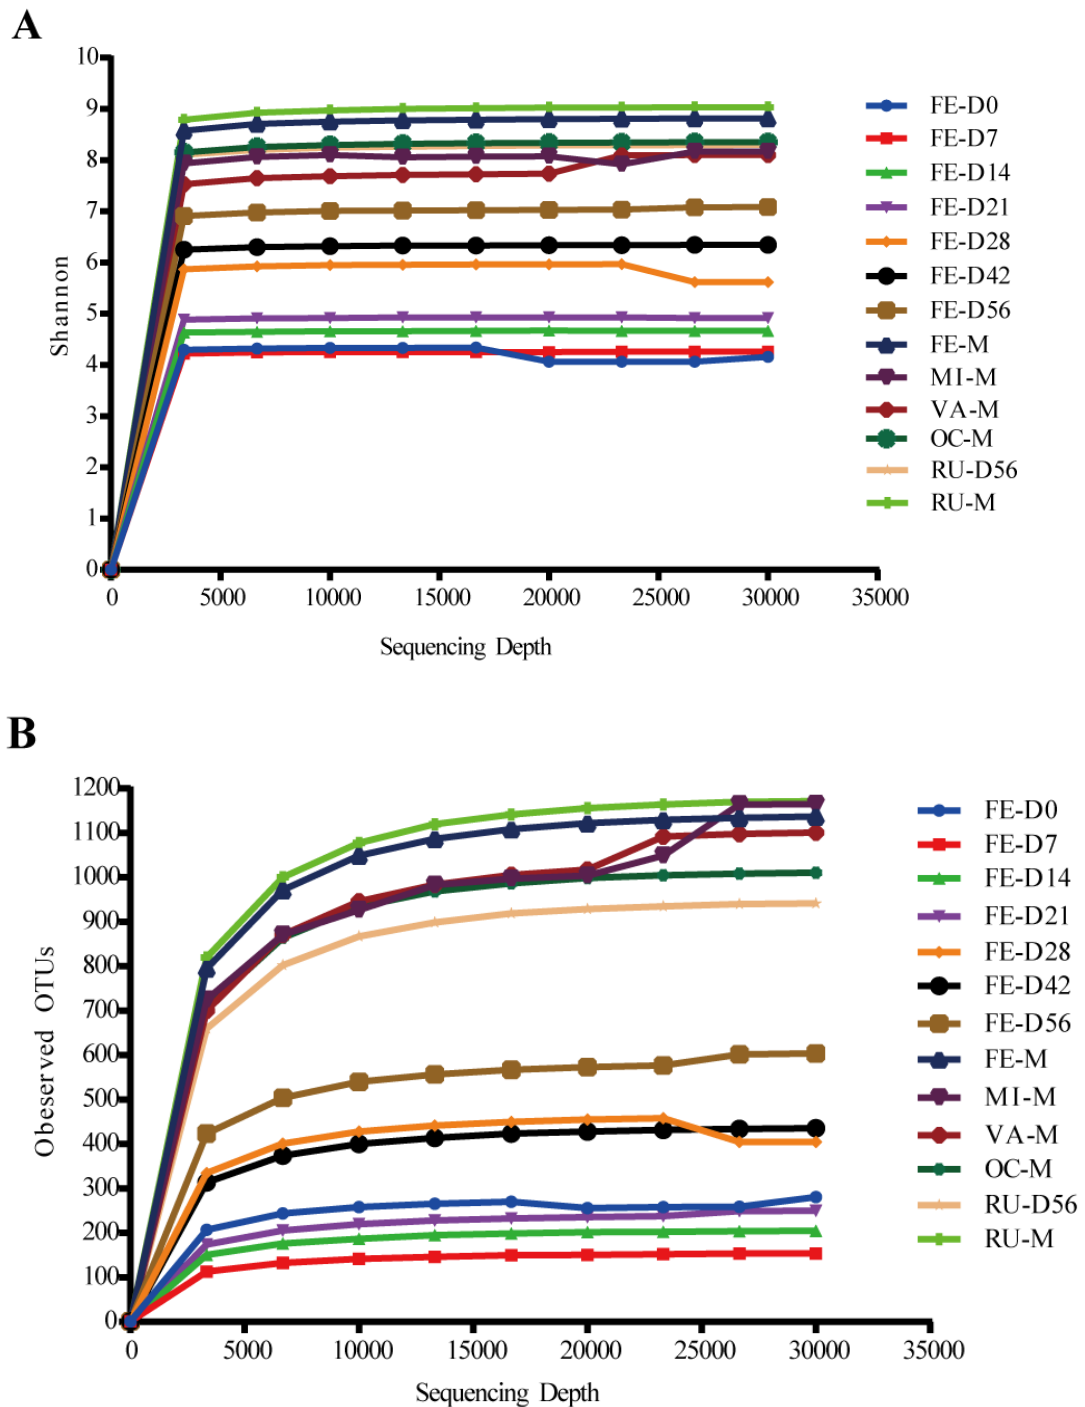

**Supplementary Figure 1 Rarefaction analyses of all sampling groups.**

(A) Rarefaction curves of all sampling groups based on the Shannon index (one curve per group). (B) Rarefaction curves of all sampling groups based on the observed OTUs (one curve per group).

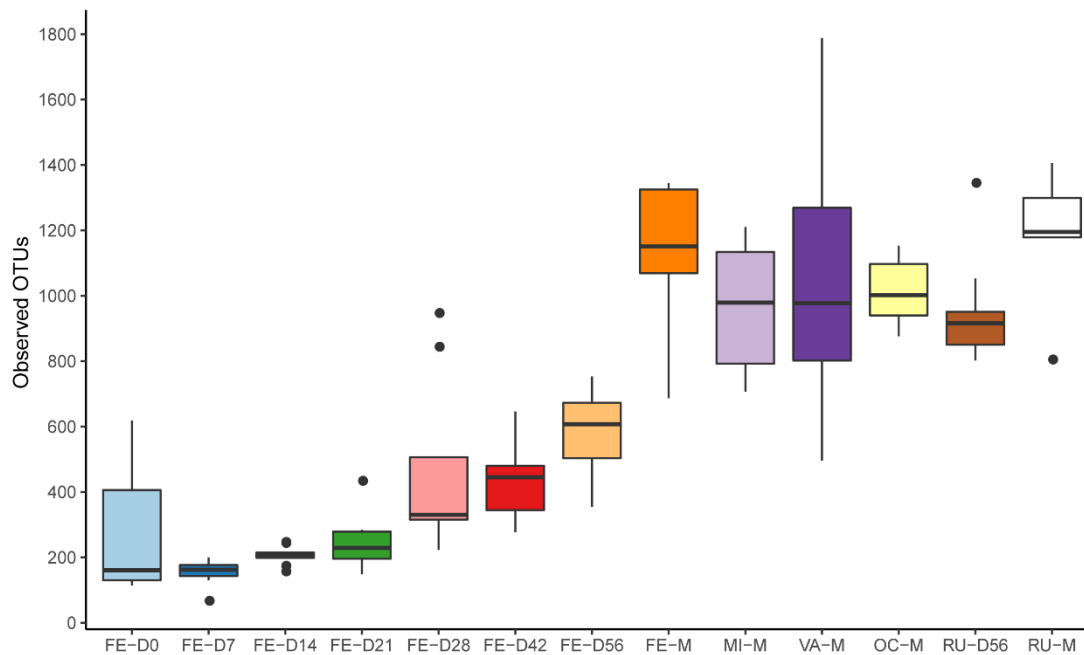

**Supplementary Figure 2 Boxplot for the observed OTUs in each microbial sampling group.**

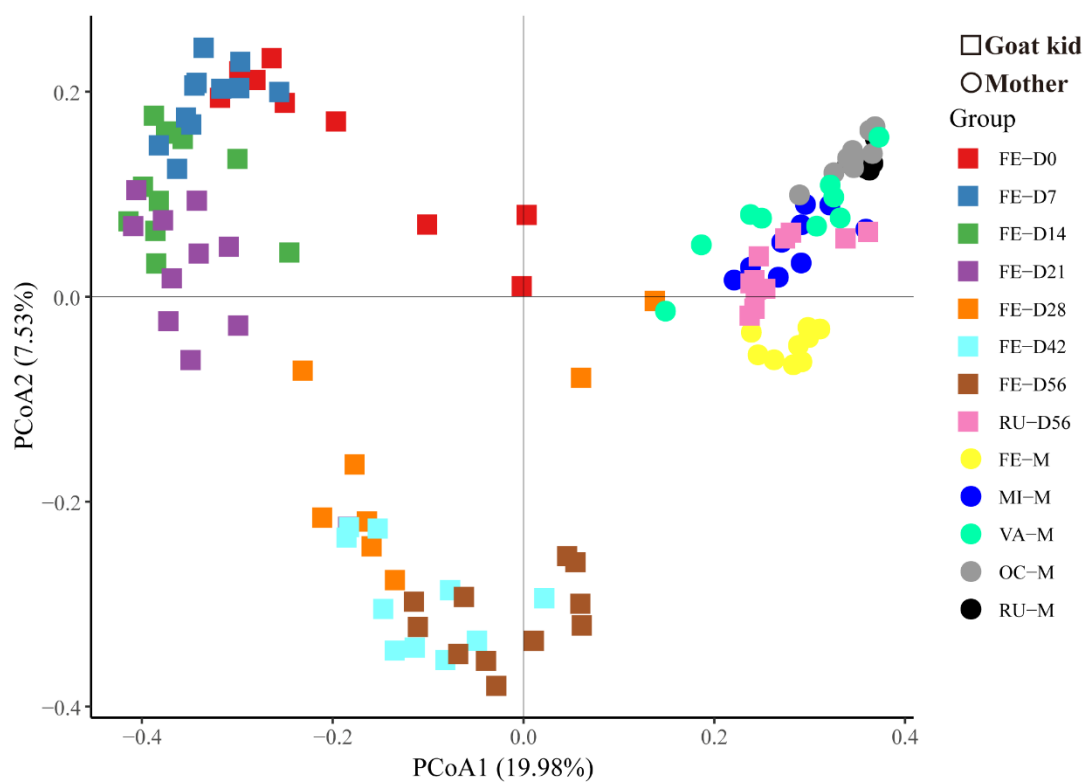

**Supplementary Figure 3 Principal coordinates analysis of all 123 microbial samples using Jaccard distance.**
